# Supplementary material for: Reversible and repeatable phase transition at a negative temperature regime for doped and co-doped spin coated mixed valence vanadium oxide thin films
Source: Royal Society of Chemistry journal article supplement (doi:10.1039/c8ra04957b), 2018-01-01
Supplement: c8ra04957b1.pdf [file c8ra04957b1.pdf]

### Supporting Information/ Electronic Supplementary Information (ESI)

Reversible and repeatable phase transition at negative temperature for doped and co-doped mixed valence vanadium oxide thin films grown on Kapton and Al6061 substrates.

Dipta Mukherjee, ArjunDey\*, A. Carmel Mary Esther, N. Sridhara, D. Raghavendra Kumar, A. Rajendra, Anand Kumar Sharma and Anoop Kumar Mukhopadhyay\*

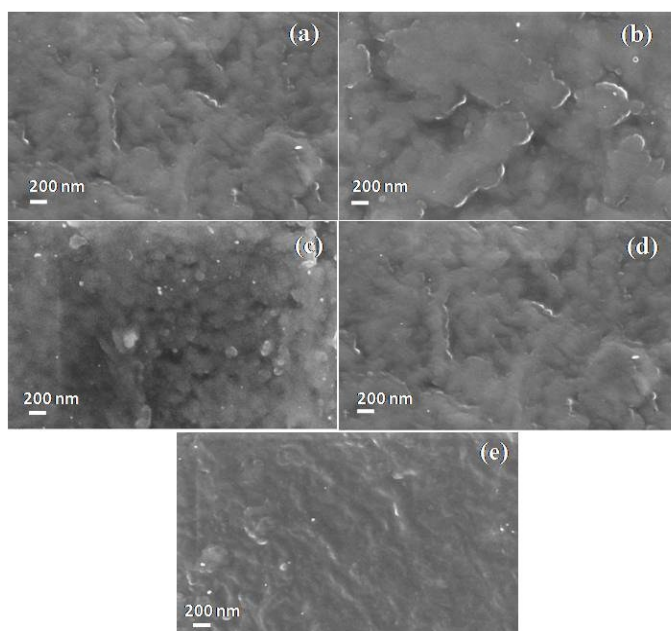

Fig.S1 Typical FESEM images of (a) FVO, (b) Mo-FVO, (c) W-FVO, (d) Ti-FVO and (e) Ti-Mo-FVO thin films on Kapton substrates.

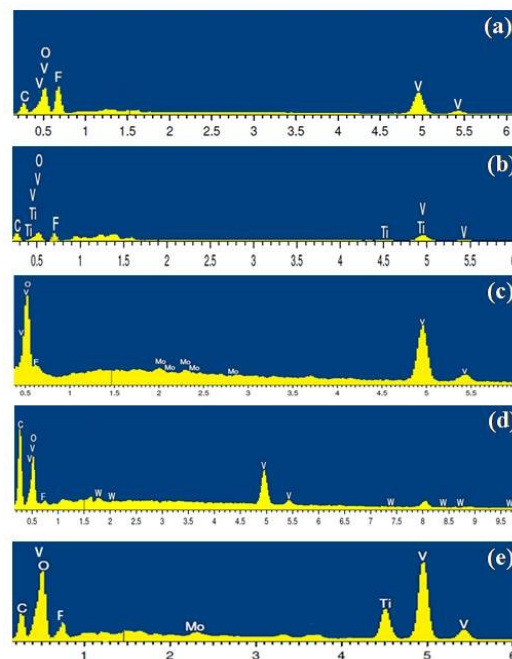

Fig.S2 EDX spectra of (a) FVO, (b) Mo-FVO, (c) W-FVO, (d) Ti-FVO and (e) Ti-Mo-FVO thin films on Kapton substrates.

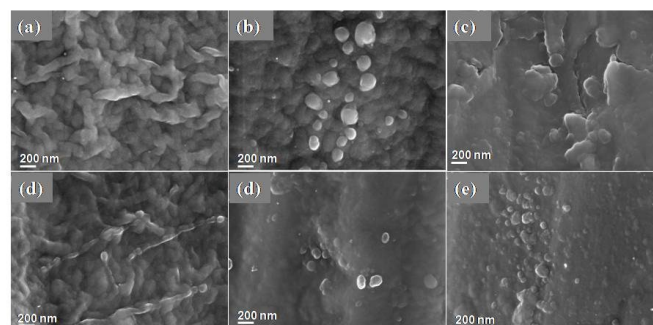

Fig.S3 Typical FESEM images of (a) FVO, (b) Mo-FVO, (c) W-FVO, (d) Ti-FVO, (e) Ti-W-FVO and (f) Ti-Mo-FVO thin films deposited on Al6061 substrates.

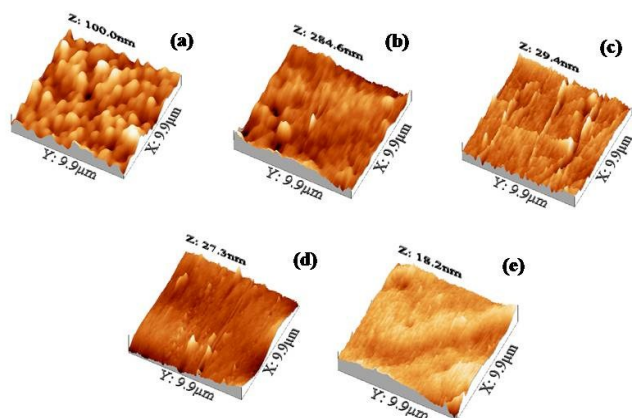

Fig.S4 3D AFM images of (a) FVO, (b) Mo-FVO, (c) W-FVO, (d) Ti-FVO and (e) Ti-Mo-FVO thin films grown on Kapton substrates.

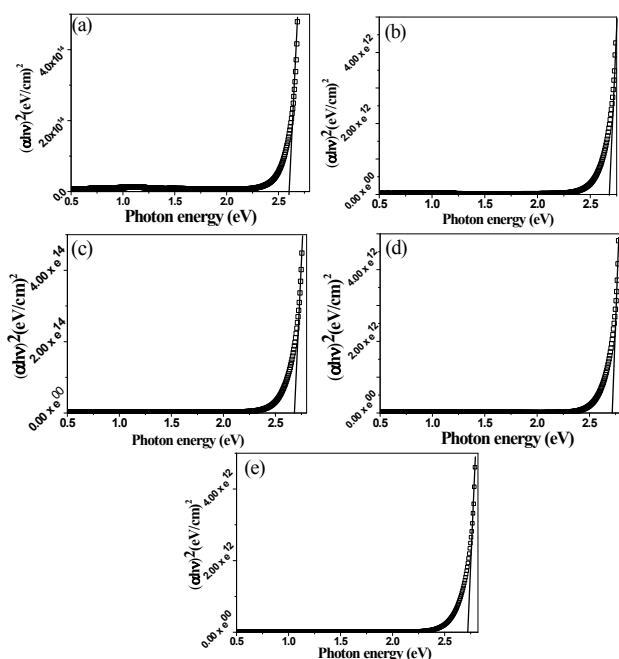

Fig.S5 Plot of  $(\alpha h\nu)^2$  versus photon energy for (a) FVO, (b) Mo-FVO, (c) W-FVO, (d) Ti-FVO and (e) Ti-Mo-FVO thin films on Kapton substrates.

| Systems    | V species       | Binding energy of V2p <sub>3/2</sub> (eV) | Relative peak intensity (%) |
|------------|-----------------|-------------------------------------------|-----------------------------|
| F VO       | V <sup>5+</sup> | 517.4                                     | 68                          |
|            | V <sup>4+</sup> | 516.4                                     | 32                          |
| Mo-FVO     | V <sup>5+</sup> | 517.2                                     | 58                          |
|            | V <sup>4+</sup> | 516.2                                     | 42                          |
| W -F VO    | V <sup>5+</sup> | 517.2                                     | 67                          |
|            | V <sup>4+</sup> | 516.4                                     | 33                          |
| Ti -FVO    | V <sup>5+</sup> | 517.3                                     | 67                          |
|            | V <sup>4+</sup> | 516.4                                     | 33                          |
| Ti -Mo-FVO | V <sup>5+</sup> | 517.3                                     | 69                          |
|            | V <sup>4+</sup> | 516.0                                     | 31                          |

Table S2. Binding energies of V species as obtained from V2p core level spectra of doped and co-doped thin films on Al6061 substrates.

| Systems    | V species       | Binding energy of V2p <sub>3/2</sub> (eV) | Relative peak intensity (%) |
|------------|-----------------|-------------------------------------------|-----------------------------|
| F VO       | V <sup>5+</sup> | 517.2                                     | 63                          |
|            | V <sup>4+</sup> | 516                                       | 37                          |
| Mo-FVO     | V <sup>5+</sup> | 517.3                                     | 58                          |
|            | V <sup>4+</sup> | 516.4                                     | 42                          |
| W -F VO    | V <sup>5+</sup> | 517.2                                     | 63                          |
|            | V <sup>4+</sup> | 516.3                                     | 37                          |
| Ti -FVO    | V <sup>5+</sup> | 517                                       | 58                          |
|            | V <sup>4+</sup> | 515.8                                     | 42                          |
| Ti -W-FVO  | V <sup>5+</sup> | 517.2                                     | 51                          |
|            | V <sup>4+</sup> | 516.2                                     | 49                          |
| Ti -Mo-FVO | V <sup>5+</sup> | 516.1                                     | 53                          |
|            | V <sup>4+</sup> | 517                                       | 47                          |

Table S1. Binding energies of V species as obtained from V2p core level spectra of doped and co-doped thin films on Kapton substrates.
